# Supplementary material for: Benzyl Isothiocyanate, a Vegetable-Derived Compound, Induces Apoptosis via ROS Accumulation and DNA Damage in Canine Lymphoma and Leukemia Cells
Source: MDPI journal article supplement (doi:10.3390/ijms222111772), 2021-10-29
Supplement: s1 [file s1]

A

| BITC ( $\mu$ M)/<br>cell line | 0                | 1.25            | 2.5              | 5                | 10               | 20               |
|-------------------------------|------------------|-----------------|------------------|------------------|------------------|------------------|
| CLBL-1 (%)                    | 92.9 $\pm$ 3.44  | 90.5 $\pm$ 2.88 | 69.3 $\pm$ 3.18  | 26.23 $\pm$ 4.68 | 10.91 $\pm$ 3.91 | 7.29 $\pm$ 3.65  |
| CLB70 (%)                     | 88.5 $\pm$ 1.93  | 86.2 $\pm$ 1.47 | 65.76 $\pm$ 2.06 | 33.63 $\pm$ 8.26 | 16.26 $\pm$ 7.48 | 8.52 $\pm$ 1.22  |
| GL-1 (%)                      | 92.03 $\pm$ 2.85 | 92 $\pm$ 2.69   | 88.9 $\pm$ 4.03  | 79.56 $\pm$ 3.41 | 54.86 $\pm$ 6.03 | 16.53 $\pm$ 4.35 |
| CNK-89 (%)                    | 94.3 $\pm$ 1.13  | 93.5 $\pm$ 1.39 | 92.43 $\pm$ 1.44 | 86.03 $\pm$ 1.66 | 69.57 $\pm$ 5.70 | 10.95 $\pm$ 5.04 |

B

| BITC ( $\mu$ M)/<br>cell line | 0                | 5                | 10               | 20               |
|-------------------------------|------------------|------------------|------------------|------------------|
| MDCK (%)                      | 93.93 $\pm$ 2.29 | 92.47 $\pm$ 1.65 | 88.80 $\pm$ 2.76 | 81.07 $\pm$ 2.80 |
| 3T3 (%)                       | 97.36 $\pm$ 0.76 | 96.3 $\pm$ 0.66  | 95.36 $\pm$ 1.47 | 93.76 $\pm$ 2.34 |

Table S1. Concentration-dependent cytotoxic effect on the canine cancer (A) and noncancerous cell lines (B). Percentage of living cells after 24 h incubation with benzyl isothiocyanate (BITC) were measured in flow cytometry after staining with propidium iodide (PI).

| <b>BITC (<math>\mu\text{M}</math>)/<br/>cell line</b> | <b>5 <math>\mu\text{M}</math></b> | <b>20 <math>\mu\text{M}</math></b> |
|-------------------------------------------------------|-----------------------------------|------------------------------------|
| <b>PBMCs (%)</b>                                      | 91.00 $\pm$ 11.14                 | 39.16 $\pm$ 10.24                  |
| <b>CLBL-1 (%)</b>                                     | 28.14 $\pm$ 4.06                  | 7.76 $\pm$ 3.71                    |
| <b>CLB70 (%)</b>                                      | 38.11 $\pm$ 9.97                  | 9.65 $\pm$ 1.58                    |
| <b>GL-1 (%)</b>                                       | 86.44 $\pm$ 1.58                  | 18.07 $\pm$ 5.32                   |
| <b>CNK-89 (%)</b>                                     | 91.23 $\pm$ 1.15                  | 11.57 $\pm$ 5.24                   |

Table S2. Comparison of the BITC effect on canine hematopoietic cancer cell lines and canine peripheral blood mononuclear cells(PBMCs) . Viability of cells after 24 h incubation with 5  $\mu\text{M}$  or 20  $\mu\text{M}$  BITC was measured in flow cytometry after staining with propidium iodide (PI). Percentage of living cells was defined in relations to untreated control cells.

| CLB70                   | Control      | z-VAD-fmk   | NAC          | BITC          | BITC + z-VAD-fmk | BITC + NAC   |
|-------------------------|--------------|-------------|--------------|---------------|------------------|--------------|
| AN+/PI- and AN+/PI+ (%) | 11.33 ± 2.51 | 8.44 ± 2.97 | 12.41 ± 0.64 | 42.056 ± 7.44 | 11.61 ± 3.48     | 12.96 ± 1.47 |
| AN-/PI+ (%)             | 1.41 ± 0.57  | 1.58 ± 0.68 | 1.19 ± 0.69  | 5.80 ± 2.62   | 2.87 ± 1.69      | 1.84 ± 0.17  |

| CLBL-1                  | Control     | z-VAD-fmk   | NAC         | BITC         | BITC + z-VAD-fmk | BITC + NAC  |
|-------------------------|-------------|-------------|-------------|--------------|------------------|-------------|
| AN+/PI- and AN+/PI+ (%) | 6.62 ± 1.01 | 6.2 ± 1.10  | 5.94 ± 0.56 | 39.75 ± 7.25 | 21.94 ± 3.98     | 6.78 ± 0.32 |
| AN-/PI+ (%)             | 1 ± 0.31    | 1.17 ± 0.27 | 0.76 ± 0.24 | 4.57 ± 1.85  | 4.74 ± 2.59      | 0.86 ± 0.10 |

Table S3. Percentage of apoptotic and necrotic CLB70 and CLBL-1 cells after 16 h incubation with BITC. Cells were stained with Annexin V-FITC/PI and the analysed in flow cytometry.

| <b>BITC (4 <math>\mu</math>M)<br/>/cell line</b> | <b>Control</b>  | <b>1.5h</b>     | <b>3h</b>        | <b>16h</b>       |
|--------------------------------------------------|-----------------|-----------------|------------------|------------------|
| <b>CLB-70 (%)</b>                                | 6.64 $\pm$ 1.76 | 7.26 $\pm$ 1.06 | 14.56 $\pm$ 3.55 | 35.77 $\pm$ 8.26 |
| <b>CLBL-1 (%)</b>                                | 7.28 $\pm$ 3.26 | 9.37 $\pm$ 2.95 | 18.09 $\pm$ 5.31 | 35.72 $\pm$ 2.76 |

Table S4. Percentage of cells with active caspase 3/7 after 1.5, 3 and 16 h incubation with BITC. Cells were stained with CellEvent®Caspase-3/7 Green Detection Reagent and SYTOX®AADvanced™ and analysed in flow cytometry.

|                   | Control         | BITC 4 $\mu$ M   |
|-------------------|-----------------|------------------|
| <b>CLB70 (%)</b>  | 6.13 $\pm$ 3.46 | 25.77 $\pm$ 5.59 |
| <b>CLBL-1 (%)</b> | 4.13 $\pm$ 3.33 | 27.10 $\pm$ 3.73 |

Table S5. Percentage of cells with active caspase 8 after 16 h incubation with BITC. Cells were stained with FITC-IETD-fmk and analysed in flow cytometry.

| <b>CLB70</b>         | <b>BITC 0 <math>\mu</math>M</b> | <b>BITC 4 <math>\mu</math>M</b> |
|----------------------|---------------------------------|---------------------------------|
| <b>Control (%)</b>   | 5.03 $\pm$ 2.20                 | 35.77 $\pm$ 8.26                |
| <b>z-VAD-fmk (%)</b> | 3.84 $\pm$ 2.63                 | 6.35 $\pm$ 3.56                 |

| <b>CLBL-1</b>        | <b>BITC 0 <math>\mu</math>M</b> | <b>BITC 4 <math>\mu</math>M</b> |
|----------------------|---------------------------------|---------------------------------|
| <b>Control (%)</b>   | 4.12 $\pm$ 1.44                 | 35.72 $\pm$ 2.76                |
| <b>z-VAD-fmk (%)</b> | 3.30 $\pm$ 0.58                 | 25.68 $\pm$ 3.07                |

Table S6. Percentage of cells with active caspase 3/7 16 h incubation with BITC with (z-VAD-fmk) or without (Control) pretreatment with pancaspase inhibitor. Cells were stained with CellEvent®Caspase-3/7 Green Detection Reagent and SYTOX®AADvanced™ and analysed in flow cytometry

| <b>CLB70</b> | <b>Control</b> | <b>BITC 4 <math>\mu</math>M</b> | <b>BITC 6 <math>\mu</math>M</b> |
|--------------|----------------|---------------------------------|---------------------------------|
| <b>0.5 h</b> | 100.00         | 144.36 $\pm$ 10.89              | 135.79 $\pm$ 18.20              |
| <b>1.5 h</b> | 100.00         | 108.69 $\pm$ 6.12               | 101.95 $\pm$ 8.43               |

| <b>CLBL-1</b> | <b>Control</b> | <b>BITC 4 <math>\mu</math>M</b> | <b>BITC 6 <math>\mu</math>M</b> |
|---------------|----------------|---------------------------------|---------------------------------|
| <b>0.5h</b>   | 100.00         | 152.33 $\pm$ 13.40              | 147.32 $\pm$ 11.37              |
| <b>1.5h</b>   | 100.00         | 119.02 $\pm$ 1.98               | 113.10 $\pm$ 16.93              |

Table S7. Increase (%) in ROS accumulation in CLB70 and CLBL-1 cells incubated with BITC for 0.5 and 1.5 h. Cells stained with 2',7'-Dichlorofluorescein Diacetate (DCF-DA) were analysed in flow cytometry. The fluorescence in untreated cells (Control) was defined as 100%.
